# Supplementary material
Source: PubMed Central journal article supplement (PMC3843138)
Supplement: supp_126.23.5477_JCS137026.pdf [file supp_126.23.5477_JCS137026.pdf]

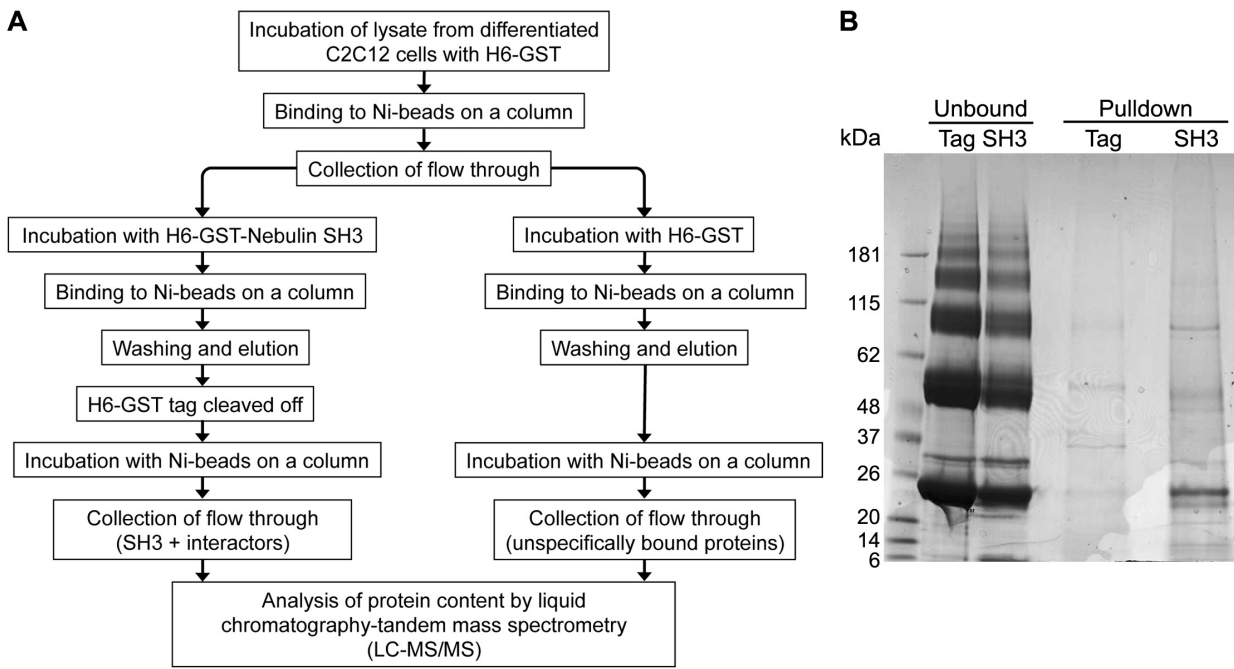

**Fig. S1: Nebulin SH3 pulldown assay.** A. Experimental scheme for the nebulin SH3 pulldown assay on cell lysate from differentiated C2C12 cells. B. SDS-PAGE gel on unbound and pulled down fractions using H6-GST-3C tagged nebulin SH3 domain (SH3) and H6-GST-3C tag (tag).

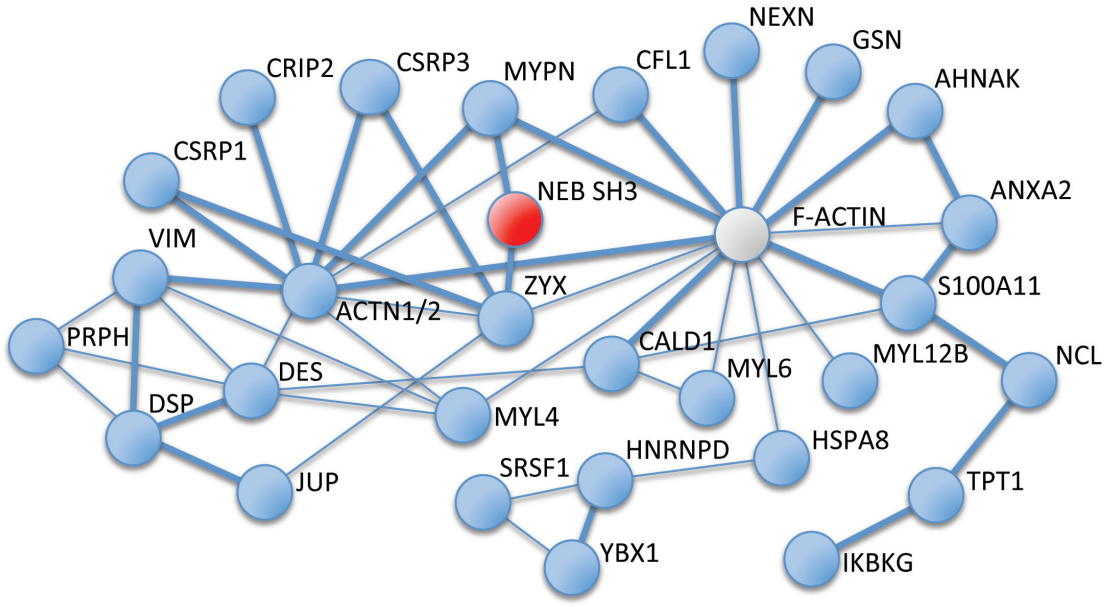

**Fig. S2. Protein association network based on the proteins identified in the nebulin SH3 pulldown using STRING 9.05 software.** Experimentally proven interactions are highlighted by thick lines. Although  $\alpha$ -actinin 2 (ACTN2) and F-actin (represented in grey) were not among the identified proteins, they were included in the protein association network, since they are known to associate with many of the identified proteins.

**Table SI: Gene expression microarray analysis on tibialis anterior muscle from NebΔSH3 mice compared to WT.**

| Gene Name                                                                    | Gene symbol | Gene identifier | Fold upreg. | Fold downreg. | <i>P</i> value | Adj. <i>P</i> value* |
|------------------------------------------------------------------------------|-------------|-----------------|-------------|---------------|----------------|----------------------|
| Lipoprotein lipase                                                           | LPL         | NM_008509       |             | 1.46          | 0.0019         | 0.9945               |
| Elongation factor 1-alpha 1                                                  | EEF1A1      | XM_134967       | 1.44        |               | 0.0095         | 0.9945               |
| Ubiquitin B                                                                  | UBB         | NM_011664       | 1.42        |               | 0.0419         | 0.9945               |
| Uveal autoantigen with coiled-coil domains and ankyrin repeats               | UACA        | NM_028283       | 1.40        |               | 0.0055         | 0.9945               |
| ATP synthase, H <sup>+</sup> transporting, mitochondrial F0 complex, subunit | ATP5J       | NM_016755       |             | 1.39          | 0.0029         | 0.9945               |
| Translocase of inner mitochondrial membrane 8 homolog b (yeast)              | TIMM8B      | NM_013897       |             | 1.34          | 0.0464         | 0.9945               |
| Cytochrome c oxidase, subunit VIIIb                                          | COX8B       | NM_007751       |             | 1.34          | 0.0479         | 0.9945               |
| Y box protein 1                                                              | YBX1        | NM_011732       |             | 1.32          | 0.0142         | 0.9945               |
| Dystrophia myotonica-protein kinase                                          | DMPK        | NM_032418       | 1.27        |               | 0.0099         | 0.9945               |
| Milk fat globule-EGF factor 8 protein                                        | MFGE8       | NM_001045489    | 1.27        |               | 0.0241         | 0.9945               |
| Capping protein (actin filament) muscle Z-line, beta                         | CAPZB       | NM_001037761    |             | 1.25          | 0.0366         | 0.9945               |
| Collagen, type VI, alpha 1                                                   | COL6A1      | NM_009933       | 1.24        |               | 0.0088         | 0.9945               |
| G1 to S phase transition 1, transcript variant 1                             | GSPT1       | NM_146066       |             | 1.24          | 0.0146         | 0.9945               |
| Prion protein                                                                | PRNP        | NM_011170       | 1.23        |               | 0.0220         | 0.9945               |
| NADH dehydrogenase (ubiquinone) 1 beta subcomplex, 6                         | NDUFB6      | XM_131359       |             | 1.21          | 0.0158         | 0.9945               |
| Aspartyl-tRNA synthetase, transcript variant 2                               | DARS        | NM_145507       |             | 1.21          | 0.0196         | 0.9945               |
| Polymerase (RNA) II (DNA Directed) Polypeptide L, 7.6kDa                     | POLR2L      | ILMN_2503728    | 1.21        |               | 0.0366         | 0.9945               |
| Cullin 3                                                                     | CUL3        | NM_016716       |             | 1.21          | 0.0289         | 0.9945               |
| Transmembrane protein 147                                                    | TMEM147     | NM_027215       | 1.20        |               | 0.0081         | 0.9945               |
| Prefoldin 2                                                                  | PFDN2       | NM_011070       | 1.20        |               | 0.0127         | 0.9945               |
| Ornithine decarboxylase antizyme 1                                           | OAZ1        | NM_008753       | 1.20        |               | 0.0485         | 0.9945               |

*P* < 0.05, fold change > 1.2. \*Adjusted *P* value is calculated using the Benjamini and Hochberg method.
